# Supplementary material
Source: Frontiers journal article supplement (https://www.frontiersin.org/articles/370199)
Supplement: Table_1.PDF [file Table_1.PDF]

## Type of XR and Technologies/Platforms Used

| Soundscape                                                 |                                                             | Installation                          |                                            | Augmented Reality                                        |                                                                                                     | Augmented Virtuality             |                                                                               | Virtual Reality                                      |                                                                                   |
|------------------------------------------------------------|-------------------------------------------------------------|---------------------------------------|--------------------------------------------|----------------------------------------------------------|-----------------------------------------------------------------------------------------------------|----------------------------------|-------------------------------------------------------------------------------|------------------------------------------------------|-----------------------------------------------------------------------------------|
| technology                                                 | platform                                                    | technology                            | platform                                   | technology                                               | platform                                                                                            | technology                       | platform                                                                      | technology                                           | platform                                                                          |
| The Sensorium – Hinterberger (2011)                        |                                                             | ColourVision – Wiethoff & Butz (2010) |                                            | Multisensory Interactive Window – Angelini et al. (2015) |                                                                                                     | Powered to Play – Seaborn (2016) |                                                                               | PsychicVR – Amores et al. (2016)                     |                                                                                   |
| surround speakers, EEG, projector, GSR, pulse, respiration | Thought Translation Device, PC, DMX control unit            | camera, RGB lights                    | C++ video analysis software, DMX converter | touch screen, camera, diffuser, air blower               | PQLab G4S multitouch overlay, HD camera, All-In-One Touchscreen PC, Google Chrome web & .NET app    | smartphone                       | Android or iOS, Javascript framework (Appcelerator Titanium), Google Maps API | HMD, EEG                                             | Oculus Rift, Interaxon Muse                                                       |
| Sonic Cradle (mod) – Kitson et al. (2014)                  |                                                             | ORGONA – Bal (2013)                   |                                            | Catching Fireflies – Eubanks (2011)                      |                                                                                                     |                                  |                                                                               | Emotional Beasts – Bernal & Maes (2017)              |                                                                                   |
| surround speakers, respiration                             | Thought Technology ProComp2, Max MSP                        | motion sensor, microphone, projector  | Kinect, Arduino, Processing                | smartphone                                               | Android                                                                                             |                                  |                                                                               | HMD, PPG, GSR, mocap suit                            | HTC Vive, Shimmer3, Perception Neuron, Unreal                                     |
| SOLAR – Prpa et al. (2015)                                 |                                                             | ORGONA Underwater – Bal (2013)        |                                            | Inner Garden – Roo et al. (2017)                         |                                                                                                     |                                  |                                                                               | Cemetery & Park VE – Chittaro et al. (2017)          |                                                                                   |
| surround speakers, respiration, EEG                        | Thought Technology ProComp2, Max MSP, Emotiv EPOC, Unity    | motion sensor, microphone, projector  | Kinect, Arduino, Processing                | projector, respiration, HR, (HMD)                        | www, Unity, Open Vibe, ASUS short-throw projector, Kinect v1, Mio Fuse smartwatch (Oculus Rift DK2) |                                  |                                                                               | HMD, PPG                                             | SonyHMZ-T1, Thought Technology ProComp Infiniti                                   |
| Sonic Cradle + – Prpa et al. (2016)                        |                                                             | ORGONA Chakra – Bal (2013)            |                                            | MikuMikuDance – Sakamoto et al. (2015)                   |                                                                                                     |                                  |                                                                               | Angkor Wat – Choo & May (2014)                       |                                                                                   |
| surround speakers, respiration, EEG                        | Thought Technology ProComp2, Max MSP, Interaxon Muse, Unity | motion sensor, projector              | Kinect, Processing                         | projectors, cameras, motion sensor                       | Kinect, OpenNI, Skype                                                                               |                                  |                                                                               | HMD, EEG                                             | Oculus Rift DK2, Emotiv EPOC                                                      |
| Sonic Cradle – Vidyarthi (2012)                            |                                                             | ORGONA Prana – Bal (2013)             |                                            | Virtual Aquarium – Sakamoto et al. (2015)                |                                                                                                     |                                  |                                                                               | Osmose – Davies & Harrison (1996)                    |                                                                                   |
| surround speakers, respiration                             | Thought Technology ProComp2, Max MSP                        | motion sensor, projector              | Kinect, Processing                         | accelerometer, mirror display                            | 3-axis accelerometer                                                                                |                                  |                                                                               | HMD, respiration vest, posture sensors               | Division Dvisor HMD, Polhemus Fastrak, custom breathing vest                      |
|                                                            |                                                             |                                       |                                            |                                                          |                                                                                                     |                                  |                                                                               | Strata – Du Plessis (2017)                           |                                                                                   |
|                                                            |                                                             |                                       |                                            |                                                          |                                                                                                     |                                  |                                                                               | HMD, EEG ,GSR, HR, respiration                       | Oculus CV1, Interaxon Muse, custom conductive band                                |
|                                                            |                                                             |                                       |                                            |                                                          |                                                                                                     |                                  |                                                                               | Realistic Avatar Communication – Garau et al. (2003) |                                                                                   |
|                                                            |                                                             |                                       |                                            |                                                          |                                                                                                     |                                  |                                                                               | CAVE, HMD                                            | ReaCT by Trimention, Silicon Graphics Onyx w/ two Polymus Fastraks, DIVE software |
|                                                            |                                                             |                                       |                                            |                                                          |                                                                                                     |                                  |                                                                               | Virtual Sophrologist – Gu & Frasson (2017)           |                                                                                   |
|                                                            |                                                             |                                       |                                            |                                                          |                                                                                                     |                                  |                                                                               | HMD, EEG                                             | EMOTIV EPOC EEG, Windows Unity Server UDP to VR, Samsung Gear VR                  |
|                                                            |                                                             |                                       |                                            |                                                          |                                                                                                     |                                  |                                                                               | Virtual Meditative Walk – Gromala et al. (2015)      |                                                                                   |
|                                                            |                                                             |                                       |                                            |                                                          |                                                                                                     |                                  |                                                                               | Stereoscopic viewer, GSR                             | DeepStream, GSR fingerclip                                                        |
|                                                            |                                                             |                                       |                                            |                                                          |                                                                                                     |                                  |                                                                               | RelaWorld – Kosunen et al. (2016)                    |                                                                                   |
|                                                            |                                                             |                                       |                                            |                                                          |                                                                                                     |                                  |                                                                               | HMD, EEG                                             | Oculus Rift DK2, QuickAmp, Open Vibe framework                                    |
|                                                            |                                                             |                                       |                                            |                                                          |                                                                                                     |                                  |                                                                               | EmoCat – Muñoz et al. (2016)                         |                                                                                   |
|                                                            |                                                             |                                       |                                            |                                                          |                                                                                                     |                                  |                                                                               | HMD, smart watch, headphones, gamepad                | LG G Watch R, Samsung Galaxy S4 w/low-cost HMD, PhysioVR, Unity                   |
|                                                            |                                                             |                                       |                                            |                                                          |                                                                                                     |                                  |                                                                               | VR DBT – Navarro-Haro et al. (2017)                  |                                                                                   |
|                                                            |                                                             |                                       |                                            |                                                          |                                                                                                     |                                  |                                                                               | HMD                                                  | Oculus Rift DK2                                                                   |
|                                                            |                                                             |                                       |                                            |                                                          |                                                                                                     |                                  |                                                                               | Life Tree – Patibanda (2017)                         |                                                                                   |
|                                                            |                                                             |                                       |                                            |                                                          |                                                                                                     |                                  |                                                                               | HMD, microphone                                      | Smartphone w/ HMD, respiration headset                                            |
|                                                            |                                                             |                                       |                                            |                                                          |                                                                                                     |                                  |                                                                               | Pulse Breath Water – Prpa et al. (2017)              |                                                                                   |
|                                                            |                                                             |                                       |                                            |                                                          |                                                                                                     |                                  |                                                                               | HMD, respiration belt                                | Oculus Rift DK2, Thought Technology, Max MSP patch, M+M middleware, Unity         |
|                                                            |                                                             |                                       |                                            |                                                          |                                                                                                     |                                  |                                                                               | Google Earth VR – Quesnel & Riecke (2017)            |                                                                                   |
|                                                            |                                                             |                                       |                                            |                                                          |                                                                                                     |                                  |                                                                               | HMD, camera                                          | HTC Vive, Logitech HD C270 webcam and LEDs casting unidirectional light           |
|                                                            |                                                             |                                       |                                            |                                                          |                                                                                                     |                                  |                                                                               | DEEP – van Rooij (2016)                              |                                                                                   |
|                                                            |                                                             |                                       |                                            |                                                          |                                                                                                     |                                  |                                                                               | HMD, respiration                                     | Oculus Rift DK1/2                                                                 |
|                                                            |                                                             |                                       |                                            |                                                          |                                                                                                     |                                  |                                                                               | Meditation Chamber – Shaw et al. (2007)              |                                                                                   |
|                                                            |                                                             |                                       |                                            |                                                          |                                                                                                     |                                  |                                                                               | HMD, GSR, respiration, pulse                         | VFX-3D (interactive imaging systems), Thought Technology ProComp+, SVE Toolkit    |

| 1. source and full reference                                                                                                                                                                                                                                                                                                                                                                                                                                                                            | 2. description and name of the immersive interactive system                                                                                                                                                              | 3. relevance to well-being and positive functioning                                                                                            | 4. type of XR                                    | 5. technology used                               | 6. platform                                                                                                                                                                     | 7. target user                                     | 8. number of users in study | 9. input / output modalities                                                                                                                                                                                                                                                                                                                                                                                                                                                                                                | 10. design elements and interaction strategies used                                                                                                                                                                                                                                                                                                                         | 11. outcome                                                                                                                                                                                                                                                                                                                                                       | 12. how design elements and interaction strategies contributed to support positive change and/or elicit positive states                                                                                                                                                                                                                       |
|---------------------------------------------------------------------------------------------------------------------------------------------------------------------------------------------------------------------------------------------------------------------------------------------------------------------------------------------------------------------------------------------------------------------------------------------------------------------------------------------------------|--------------------------------------------------------------------------------------------------------------------------------------------------------------------------------------------------------------------------|------------------------------------------------------------------------------------------------------------------------------------------------|--------------------------------------------------|--------------------------------------------------|---------------------------------------------------------------------------------------------------------------------------------------------------------------------------------|----------------------------------------------------|-----------------------------|-----------------------------------------------------------------------------------------------------------------------------------------------------------------------------------------------------------------------------------------------------------------------------------------------------------------------------------------------------------------------------------------------------------------------------------------------------------------------------------------------------------------------------|-----------------------------------------------------------------------------------------------------------------------------------------------------------------------------------------------------------------------------------------------------------------------------------------------------------------------------------------------------------------------------|-------------------------------------------------------------------------------------------------------------------------------------------------------------------------------------------------------------------------------------------------------------------------------------------------------------------------------------------------------------------|-----------------------------------------------------------------------------------------------------------------------------------------------------------------------------------------------------------------------------------------------------------------------------------------------------------------------------------------------|
| Angelini, L., Caon, M., Couture, N., Khaled, O. A., & Mugellini, E. (2015). The Multisensory Interactive Window: Immersive Experiences for the Elderly. In Adjunct Proceedings of the 2015 ACM International Joint Conference on Pervasive and Ubiquitous Computing and Proceedings of the 2015 ACM International Symposium on Wearable Computers (pp. 863-868). New York, NY, USA: ACM. <a href="https://doi.org/10.1145/2800835.280209">https://doi.org/10.1145/2800835.280209</a>                    | Multisensory Interactive Window                                                                                                                                                                                          | enhance the older adult's well-being at home                                                                                                   | AR, tangibles                                    | touch screen, camera                             | POLab G4S multitouch overlay, HD camera, All-in-One Touchscreen PC, Google Chrome web app, .NET app                                                                             | older adults                                       | N/A                         | Input: opening physical window, touch gestures, weather API, output: telepresence audio/visuals, open/close virtual blinds, smell and air blower.                                                                                                                                                                                                                                                                                                                                                                           | connection, nature elements, social presence                                                                                                                                                                                                                                                                                                                                | Proof of concept: human-to-human connection, increased well-being                                                                                                                                                                                                                                                                                                 | Connecting with others remotely and discovering different places in the world.                                                                                                                                                                                                                                                                |
| Amores, J., Benavides, X., & Maes, P. (2016). <i>PsychicVR: Increasing Mindfulness by Using Virtual Reality and Brain-Computer Interfaces</i> . Proceedings of the 2016 CHI Conference, Extended Abstracts on Human Factors in Computing Systems, CHI EA '16, pp. 2-3. New York, NY, USA: ACM. <a href="https://doi.org/10.1145/2851681.2858442">https://doi.org/10.1145/2851681.2858442</a>                                                                                                            | PsychicVR: virtually create and control fire through concentration                                                                                                                                                       | improve mindfulness                                                                                                                            | VR, biofeedback                                  | HMD, EEG                                         | Oculus Rift, Muse EEG                                                                                                                                                           | humans                                             | N/A                         | Input: brain electrical activity, output: virtual fire created and levitates up with higher concentration                                                                                                                                                                                                                                                                                                                                                                                                                   | concentrate more = visual feedback; superhero metaphor                                                                                                                                                                                                                                                                                                                      | Proof of concept                                                                                                                                                                                                                                                                                                                                                  | Increase mindfulness through concentrating on making a virtual object levitate. Playful design through immersive environment and having superpowers                                                                                                                                                                                           |
| Bai, H. (2013). <i>Responsive Aesthetics for Yoga: Meditation, An Innovative Design Theory for Holistic Health that Supports Autonomy and Effective Training</i> . M.Des., Canada: Ontario College of Art & Design (Canada). Retrieved from <a href="https://search.proquest.com/ocad/pdq/docview/1490793559/abstract/9243403F/E69845F4Pdq?pq-origsite=scholarlink">https://search.proquest.com/ocad/pdq/docview/1490793559/abstract/9243403F/E69845F4Pdq?pq-origsite=scholarlink</a>                   | ORCONA: using your breath, you can virtually propel a cloth into space                                                                                                                                                   | breathing practices, borrowed from meditation and yoga practices, to foster physical and psychological empowerment                             | projection, biofeedback                          | motion sensor, microphone, projector             | Kinect, Arduino, Processing                                                                                                                                                     | individuals who face mental and physical disorders | N/A                         | Input: exhaling and x-axis body motion; output: cloth floats higher and background scrolls up when exhaling, and down when no input. Move to get under the cloth.                                                                                                                                                                                                                                                                                                                                                           | breath awareness and embodied physical empowerment                                                                                                                                                                                                                                                                                                                          | Proof of concept                                                                                                                                                                                                                                                                                                                                                  | Mind-body dialogues: a calm body breeds a calm mind. The gamified aspect allows a state of flow to create conditions for increased well-being.                                                                                                                                                                                                |
|                                                                                                                                                                                                                                                                                                                                                                                                                                                                                                         | ORCONA Underwater: using your breath, create ripples in a virtual underwater                                                                                                                                             | exercise of healthy behaviour                                                                                                                  | projection, biofeedback                          | motion sensor, projector                         | Kinect, Arduino, Processing                                                                                                                                                     | individuals who face mental and physical disorders | N/A                         | Input: exhaling and x-axis body motion; output: cloth floats higher and background scrolls up when exhaling, and down when no input. Move to get under the cloth.                                                                                                                                                                                                                                                                                                                                                           | breath awareness and embodied physical empowerment                                                                                                                                                                                                                                                                                                                          | Prototype                                                                                                                                                                                                                                                                                                                                                         | Mind-body dialogues: a calm body breeds a calm mind. The gamified aspect allows a state of flow to create conditions for increased well-being.                                                                                                                                                                                                |
|                                                                                                                                                                                                                                                                                                                                                                                                                                                                                                         | Interactive Chakra-based Breathwork: visualize your breath as a virtual outline of a person with an orb of energy                                                                                                        | focus on breathing and relaxation from meditation practices                                                                                    | projection in dark room, biofeedback             | motion sensor, projector                         | Kinect, Processing                                                                                                                                                              | individuals who face mental and physical disorders | 5                           | Input: inhaling with arms up → inhale sound, outline of virtual body mirrored, fireflies move inward, and circle decreases into the virtual body, exhaling with arms down → exhale sound, outline of virtual body lights up with chakras, fireflies move outward, and circle increases outward same as above except with cosmos background imagery moving clockwise and counter-clockwise with inhalation and exhalation, respectively. Chakras disappear first, then reappear in reverse order to complete the experience. | visual and auditory cues help user breath smoothly and deeply, gradually, the exhales move through the chakras until only the breath is left - abstract orb that responds to breathing, representing transcendence.                                                                                                                                                         | Strong calming effect. Reprogramming of clarity, awareness to breathing. Visuals and audio helpful indicators of progress; Arm movements natural way to signify breathing. Circle visuals should be reversed to be congruent with actual body expanding/contracting during breathing. Music should be simple and related to holistic health.                      | Cathartic healing through breathwork and gradual transcendence provided by natural body movements and visual/auditory feedback to show performance.                                                                                                                                                                                           |
|                                                                                                                                                                                                                                                                                                                                                                                                                                                                                                         | ORCONA Phara: interaction of above system with extended narrative and more auditory feedback                                                                                                                             | focus on breathing and relaxation from meditation practices                                                                                    | projection in dark room, biofeedback             | motion sensor, projector                         | Kinect, Processing                                                                                                                                                              | individuals who face mental and physical disorders | 5                           | Input: heart rate, skin conductance (emotional arousal); output: reactive fur and particle system brightness/color                                                                                                                                                                                                                                                                                                                                                                                                          | Same as above; repeated in reverse order of chakras.                                                                                                                                                                                                                                                                                                                        | Positive experience; relaxing; visuals good feedback for performance; audio can be intrusive; End of experience unclear.                                                                                                                                                                                                                                          | Use of visual feedback that was both abstract and related to spiritual practices of bodily sensations and chakras helped users to relax and focus on their breath.                                                                                                                                                                            |
| Bernal, G., & Maes, P. (2017). <i>Emotional Beasts: Visually Expressing Emotions Through Avatars in VR</i> . Proceedings of the 2017 CHI Conference, Extended Abstracts on Human Factors in Computing Systems, CHI EA '17, pp. 2355-2400. New York, NY, USA: ACM. <a href="https://doi.org/10.1145/3027083.3053207">https://doi.org/10.1145/3027083.3053207</a>                                                                                                                                         | Emotional Beasts: affective expression in social VR                                                                                                                                                                      | fostering deep, emotionally compelling human-to-human connection                                                                               | VR, biofeedback                                  | HMD, PPG, GSR, mocap sensor suit                 | HTC Vive VR headset, Shimmer3 sensor, Perception Neuron suit, Unreal Engine                                                                                                     | humans                                             | N/A                         | Input: heart rate, skin conductance (emotional arousal); output: reactive fur and particle system brightness/color                                                                                                                                                                                                                                                                                                                                                                                                          | Visually express emotions, VR avatars project non-verbal cues from the wearer's emotional state                                                                                                                                                                                                                                                                             | Proof of concept                                                                                                                                                                                                                                                                                                                                                  | VR avatars project non-verbal cues from the wearer's emotional state, so that virtual users can both communicate and perceive emotions in social VR                                                                                                                                                                                           |
| Chittka, L., Sironi, R., Ciescinski, C., & Fabbro, F. (2017). <i>Mortality salience in virtual reality: effects on users' attitudes towards risk</i> . International Journal of Human-Computer Studies, 101, 10-22. <a href="https://doi.org/10.1016/j.ijhcs.2017.03.002">https://doi.org/10.1016/j.ijhcs.2017.03.002</a>                                                                                                                                                                               | Cemetery and Park VE: using VR elicit mortality salience                                                                                                                                                                 | mortality salience is linked to increasing positive health and well-being, inducing mindfulness                                                | VR, biofeedback                                  | HMD, PPG                                         | SonyHMZ-T1 stereoscopic HMD, Thought Technology ProComp Infiniti encoder                                                                                                        | 108 (55 Female)                                    | N/A                         | Input: Nintendo Nunchuck joystick; output: movement in VE                                                                                                                                                                                                                                                                                                                                                                                                                                                                   | Visual mortality cues such as tombs, burialcaskets, and a group of mourners attending a funeral                                                                                                                                                                                                                                                                             | Proof of concept                                                                                                                                                                                                                                                                                                                                                  | Cemetery VE elicited death related themes compared to park VE; Increased risk perception for both the self and others; Harm Avoidance as a personality factor is a mediating trait for risk perception; mindfulness personality not a factor; heart rate variability was increased.                                                           |
| Choo, A., & May, A. (2014). <i>Virtual Mindfulness Meditation: Virtual Reality and Electroencephalography for Health Gamification</i> . 2014 IEEE Games, Media, Entertainment (pp. 10-14). New York, NY: USA: ACM. <a href="https://doi.org/10.1145/250065.250072">https://doi.org/10.1145/250065.250072</a>                                                                                                                                                                                            | Angkor Wat: virtual guided seated meditation that is gamified for learning mindfulness                                                                                                                                   | mindfulness has many health benefits, so training can help encourage positive functioning                                                      | VR, biofeedback                                  | EEG                                              | Emotiv EPOC EEG                                                                                                                                                                 | all who would like to learn mindfulness            | N/A                         | Input: brain electrical activity; output: virtual flowers bloom in VE                                                                                                                                                                                                                                                                                                                                                                                                                                                       | The more flowers in bloom, the higher the player's meditative scores. A lower meditative score will have fewer flowers in bloom at any given time                                                                                                                                                                                                                           | Proof of concept                                                                                                                                                                                                                                                                                                                                                  | Use of visual feedback shows learning progress of meditation, which may accelerate the positive benefits of meditation. Calming visuals and audio contribute to relaxed state.                                                                                                                                                                |
| Devlin, C., & Harrison, J. (1998). <i>Onsense: Towards Broadening the Aesthetics of Virtual Reality</i> . SIGGRAPH Comput. Graph., 30 (4), 25-29. <a href="https://doi.org/10.1145/245006.245008">https://doi.org/10.1145/245006.245008</a>                                                                                                                                                                                                                                                             | Omsense: a virtual environment that allows users to shed their habitual ways of looking at and behaving in the world                                                                                                     | self-transcendence: the goal is to experience the real world in a fresh way, reawakening a fundamental sense of their own "being-in-the-world" | VR, biofeedback                                  | HMD, Respiration vest                            | Division DVIator HMD, Pothemus Fasttrak, custom breathing vest, Onyx RealityEngine2, software SAAPHIRE and DKL development libraries, SGI's Performer and GL graphics libraries | humans                                             | N/A                         | Input: breath, posture tilt; output: movement vertical, movement horizontal                                                                                                                                                                                                                                                                                                                                                                                                                                                 | Emphasis on "being" rather than "doing. Attain full-body immersion through meditation and tai chi practices. Creating a sense of floating through breath and balance. Breath in to move up, breath out to move down; tilt body in direction you want to move horizontally. Evocative audio and human voices to reaffirm the role of the physical body in the virtual space. | Feeling calm, a loosening of the boundaries between self and world, simultaneous awareness of them being carried away by the visual aesthetic, being able to float and pass through things; and embodied (due to reliance on breath and balance, emotional, euphoric).                                                                                            | By enabling people to experience the unusual sensations of seeing and feeling through things, they are freed of their usual, habitual ways of seeing the world. This effect, in combination with the use of breath, solitary immersion and metaphorical content, appears to induce heightened awareness.                                      |
| Di Plesia, I. (2017). <i>Strata: A Biometric VR Experience</i> . ACM SIGGRAPH 2017 VR Village, SIGGRAPH '17 (pp. 141-142). New York, NY: USA: ACM. <a href="https://doi.org/10.1145/302559.308972">https://doi.org/10.1145/302559.308972</a>                                                                                                                                                                                                                                                            | Strata: a biometric VR experience                                                                                                                                                                                        | immersive experience connects us to our own emotional state, teaching us to calm and focus our minds.                                          | VR, biofeedback                                  | HMD, EEG, GSR, HR, breathing                     | Oculus CV1, Muse EEG, custom conductive band                                                                                                                                    | humans                                             | N/A                         | Input: brain electrical activity, heart rate, skin conductance, breathing rate; output: levitate upward through five fantastical worlds as you reach meditative state, biometrics change audio and visual components.                                                                                                                                                                                                                                                                                                       | Mindfulness training to stress alleviation, meditation, anger management, empathy cultivating.                                                                                                                                                                                                                                                                              | Proof of concept                                                                                                                                                                                                                                                                                                                                                  | Reach meditative state and levitate upward → reaching higher state of consciousness, letting go of distractive thoughts. See visuals and audio change to gain introspection on own internal states.                                                                                                                                           |
| Eubanks, A. (2011). <i>Catching Fireflies: A Pervasive Augmented Reality Game for Android Phones</i> . (V. A. Clincy, Ed. Proceedings of the 48th Annual Association for Computing Machinery Southeast Conference (Lecture '11), 363-369.                                                                                                                                                                                                                                                               | Catching Fireflies: an AR game designed to draw people outdoors and appreciate nature.                                                                                                                                   | Calming, nostalgic experience                                                                                                                  | AR                                               | smartphone                                       | Android                                                                                                                                                                         | humans                                             | N/A                         | Input: camera, GPS coordinates, touch screen; output: vibration, animation of capturing firefly                                                                                                                                                                                                                                                                                                                                                                                                                             | Besides the camera and GPS, the application uses sound, vibration, the proximity sensor, accelerometers, and orientation sensors to encourage players to relieve their outdoor childhood memories of catching fireflies.                                                                                                                                                    | Nostalgia, getting outdoors, appreciation of nature, movement                                                                                                                                                                                                                                                                                                     | The app encourages players to go outside and partake in an activity they might not be able to do otherwise - catch fireflies. It is a playful way to get people to interact with the real environment and move their bodies, which has positive physical and psychological effects.                                                           |
| Gerasu, M., Slater, M., Vinayagamoorthy, V., Brogni, A., Steed, A., & Sasse, M. A. (2003). <i>The Impact of Avatar Realism and Eye-Game Control on Perceived Quality of Communication in a Shared Immersive Virtual Environment</i> . Proceedings of the SIGCHI Conference on Human Factors in Computing Systems, CHI '03, pp. 525-530. New York, NY: USA: ACM. <a href="https://doi.org/10.1145/959201.959203">https://doi.org/10.1145/959201.959203</a>                                               | Communicating with realistic avatars in immersive virtual environments                                                                                                                                                   | Increasing social presence and communication                                                                                                   | VR, CAVE, HMD                                    | VR CAVE, HMD                                     | RealTOR by Trimension, Silicon Graphics Onyx with two Pothemus Fasttrak, DVE software                                                                                           | humans                                             | 48 (24 Female)              | Input: analogue joystick, 5 button 3D mouse, head tracking device; output: movement, head position and orientation                                                                                                                                                                                                                                                                                                                                                                                                          | Use of high-realism avatars and non-random gaze will increase social presence and communication in VEs                                                                                                                                                                                                                                                                      | Inferred gaze high-realism avatar helps increase social presence and ease of communication                                                                                                                                                                                                                                                                        | More realistic avatars and gazing at us can help increase social presence, in turn having a positive impact on communication in social VR settings.                                                                                                                                                                                           |
| Gonzalez, P., Torra, X., Choo, A., Karamanek, M., & Shaw, C. D. (2015). <i>The Virtual Mindfulness Yoga: Virtual Reality Therapy for Chronic Pain Management</i> . Proceedings of the 33rd Annual ACM Conference on Human Factors in Computing Systems, CHI '15, pp. 511-524. New York, NY: USA: ACM. <a href="https://doi.org/10.1145/270292.2702344">https://doi.org/10.1145/270292.2702344</a>                                                                                                       | Virtual Meditative Walk: enable chronic pain patients to learn Mindfulness-based stress reduction (MBSR)                                                                                                                 | Reduce pain and increase psychological health                                                                                                  | VR, biofeedback                                  | Stereoscopic viewer, GSR                         | DeepStream VR, GSR finger clips                                                                                                                                                 | chronic pain patients                              | 6 (3 Female)                | Input: GSR arousal levels; output: virtual weather system                                                                                                                                                                                                                                                                                                                                                                                                                                                                   | light fog in the forest, for example, recedes as a patient's GSR levels start to stabilize in favor of a mindful state. Alternatively, the fog thickens and draws closer when the patient's arousal levels increase.                                                                                                                                                        | pain level decreased after the VR MBSR experience compared to the control                                                                                                                                                                                                                                                                                         | Biofeedback helped users more easily learn mindfulness practices and provide a distraction from pain, which in turn decreased their overall pain over time.                                                                                                                                                                                   |
| Gu, G., & Prasson, C. (2017). <i>Virtual Sophologist: A Virtual Reality Neurofeedback Relaxation Training System in Brain Function Assessment in Learning</i> (pp. 176-185). Springer, Cham. <a href="https://doi.org/10.1007/978-3-319-67915-9_10">https://doi.org/10.1007/978-3-319-67915-9_10</a>                                                                                                                                                                                                    | Virtual Sophologist: VR and EEG relaxation training system                                                                                                                                                               | Increased relaxation                                                                                                                           | VR, biofeedback                                  | HMD, EEG                                         | EMOTIV EPOC EEG, Windows Unity Server UDP to VR, Samsung Gear VR                                                                                                                | humans                                             | 6 (2 Female)                | Input: brain waves; output: virtual text and audio feedback                                                                                                                                                                                                                                                                                                                                                                                                                                                                 | physiological measures, mindfulness-meditation, nature elements                                                                                                                                                                                                                                                                                                             | relaxed, increased mindfulness, decreased stress/anxiety                                                                                                                                                                                                                                                                                                          | VEs support a calming environment: Seaside, Japanese Garden and Waterfall. Relaxation feedback keeps participants in the present moment.                                                                                                                                                                                                      |
| Hartnett, J., Jo, P., Ong, L., & Tjahjono, L. (2006). <i>A Responsive and Persuasive Audio Device to Stimulate Exercise and Fitness in Children</i> . CHI '06 Extended Abstracts on Human Factors in Computing Systems, CHI EA '06, pp. 1837-1842. New York, NY: USA: ACM. <a href="https://doi.org/10.1145/1125451.1125799">https://doi.org/10.1145/1125451.1125799</a>                                                                                                                                | Immersive soundscape where users control and vary music tempo based on measured activity level.                                                                                                                          | Help stimulate exercise and fitness                                                                                                            | immersive soundscape                             | Audio device, pedometer                          | TBD                                                                                                                                                                             | children aged 8-11                                 | 15                          | Input: movement; output: music                                                                                                                                                                                                                                                                                                                                                                                                                                                                                              | Increase movement → increase music tempo; decrease movement → decrease music tempo                                                                                                                                                                                                                                                                                          | Positive reception from concept testing                                                                                                                                                                                                                                                                                                                           | Moving the body to music (dancing) is a fun activity that also promotes both physical and mental health. Children are active without imposing stricter educational means of activity.                                                                                                                                                         |
| Hinterberger, T. (2011). <i>The Sensorium: A Multimodal Neurofeedback Environment</i> . Adv. in Hum. Comp. Int., 2011, 31-310. <a href="https://doi.org/10.1155/2011/724204">https://doi.org/10.1155/2011/724204</a>                                                                                                                                                                                                                                                                                    | Sensorium: a neurofeedback environment that allows people to experience signals from their nonperceptible body processes visually and auditorily                                                                         | Improving bodily awareness and self-regulation to promote positive change                                                                      | immersive soundscape and light room, biofeedback | immersive soundscape                             | Projector, surround speakers, EEG, skin conductance, pulse finger clip, repeller sensor                                                                                         | humans                                             | 20 (11 Female)              | Input: brain electrical activity, heart rate, skin conductance, breathing; output: changes in light and sound                                                                                                                                                                                                                                                                                                                                                                                                               | Positive slow potential shifts as generated on the cortex in relaxing moments should lead to a blue coloured environment. While negative shifts normally reflect attentive moments in which the brain produces a readiness state (i.e., the "Beretschaftspotential") which tuned the environment into red.                                                                  | Almost all of them reported an increase in contentment, relaxation, happiness, and inner harmony. They also reported a widening in their body consciousness.                                                                                                                                                                                                      | Use of colours corresponding to certain emotional states (blue/red). Visual and auditory representation of internal states provide concrete feedback, so users can change their states and see that automatically if successful or not.                                                                                                       |
| Janssen, J. H., van den Broek, E. L., Westenberg, J. H. D., & M., (2012). <i>Time to your emotions: a robust personalized affective music player</i> . User Modeling and User-Adapted Interaction, Doctoral Dissertation, 22(3), 255-279. <a href="http://dx.doi.org/10.1007/978-94-007-11257-01_10">http://dx.doi.org/10.1007/978-94-007-11257-01_10</a>                                                                                                                                               | Affective Music Player (AMP): selects music for mood enhancement based on biofeedback                                                                                                                                    | Improve or enhance mood                                                                                                                        | immersive soundscape, biofeedback                | Headphones                                       | Philips SBC HP400 headphones, NeXus 10 apparatus of Mind Media b.v.                                                                                                             | humans                                             | 3 Males                     | Input: skin temperature; output: corresponding music of mood                                                                                                                                                                                                                                                                                                                                                                                                                                                                | decreasing skin temperature → positive mood song; increasing skin temperature → negative mood song                                                                                                                                                                                                                                                                          | The validation of the AMP was successful. The songs selected to reduce skin temperature did indeed decrease skin temperature.                                                                                                                                                                                                                                     | Personalized music model that was first trained through regression and kernel density estimation, and then used as a way to guide affect.                                                                                                                                                                                                     |
| Kelson, A., Recke, B., & Viderholm, J. (2014). <i>Sonic Cradle: Investigating Meditative Aspects of an Interactive Technology</i> (pp. 1-4). Presented at the NCE-GRAND 2014 Conference, Ottawa, Canada. Retrieved from <a href="http://ceprn.ca.ca/1346/">http://ceprn.ca.ca/1346/</a>                                                                                                                                                                                                                 | Sonic Cradle: an interactive system designed to encourage a meditative attentional pattern akin to mindfulness                                                                                                           | Encourages people to self-regulate and manage their stress in a healthy way                                                                    | immersive soundscape, biofeedback                | respiration physiological sensor, surround-sound | Max MSP, Thought Technology ProComp2                                                                                                                                            | novice meditators                                  | 30                          | Input = breathing from abdomen and chest; hold breath to add sounds, breath quickly to subtract sounds                                                                                                                                                                                                                                                                                                                                                                                                                      | Mindfulness practice → Sonic Cradle Interaction. Calm focused attention → focus on respiratory control through sound interaction. Wandering mind → Wandering mind sounds change. Meta-awareness → Automatic breathing as attention is brought back to sounds and user wonders how their breathing controls it.                                                              | Decentering: awareness of one's experience with some distance and disidentification rather than being carried away by one's thoughts and feelings. The increased decentering score we found after Sonic Cradle shows that participants were able to emotionally detach themselves from their thoughts and feelings while still acknowledging that they are there. | Playful, non-invasive made experience inviting. Dark room with only soundscape decreased distractions and allowed focus on breathing and present moment. Selected sounds were meditative in nature - neutral or calm yet still energetic enough to keep attention. Easy to learn mapping to explore breath. Auditory feedback on performance. |
| Kosunen, I., Salminen, M., Järvelä, S., Ruusola, A., Ravaja, N., & Jauregui, G. (2010). <i>RealWorld: Neuroadaptive and Immersive Virtual Reality Meditation System</i> . Proceedings of the 21st International Conference on Intelligent User Interfaces, UII '10, pp. 205-217. New York, NY: USA: ACM. <a href="https://doi.org/10.1145/2550767.2550786">https://doi.org/10.1145/2550767.2550786</a>                                                                                                  | RealWorld: a neuroadaptive virtual reality meditation system that combines virtual reality with neurofeedback to provide a tool that is easy for novices to use yet provides added value even for experienced meditators | Meditation in general and mindfulness in particular have been shown to be useful techniques in the treatment of a plethora of ailments         | VR, biofeedback                                  | HMD, EEG                                         | Oculus Rift DK2, QuickCam, Open Vive framework                                                                                                                                  | novice meditators                                  | 43 (26 Female)              | Input: brain electrical activity; output: virtual meditation and opacity of energy bubble around user                                                                                                                                                                                                                                                                                                                                                                                                                       | increase in the power of the theta band (concentration) will produce floating; increase in the alpha band (relaxation) will increase the opacity of the energy bubble surrounding the user.                                                                                                                                                                                 | RelaxWorld system elicits deeper relaxation, feeling of presence and a deeper level of meditation when compared to a similar setup without head-mounted display or neurofeedback.                                                                                                                                                                                 | the head-mounted display generates higher meditative states when compared to the same system displayed on a normal screen. Neurofeedback further enhances the experience, providing higher levels of presence as reported by the users.                                                                                                       |
| Munoz, J. E., Paulino, L., Veenith, H., & Baras, K. (2016). <i>PhysioVR: A Novel mobile virtual reality framework for physiological computing</i> . 2016 IEEE 18th International Conference on e-Health Networking, Applications and Services (Healthcom), pp. 1-5. Presented at the 2016 IEEE 18th International Conference on e-Health Networking, Applications and Services (Healthcom), <a href="https://doi.org/10.1109/healthcom.2016.7749612">https://doi.org/10.1109/healthcom.2016.7749612</a> | EmoCat Rescue: encourages players to regularize their heartbeats in order to find a cat lost in a forest.                                                                                                                | Encourages deep breathing in order to lower heart rate, ultimately increasing health                                                           | VR, biofeedback                                  | HMD, smartwatch, headphones, gamepad             | LG G Watch R, Samsung Galaxy S4 w/ low-cost HMD, PhysioVR, Unity                                                                                                                | humans                                             | N/A                         | Input: heart rate, gamepad; output: movement, cat's meow                                                                                                                                                                                                                                                                                                                                                                                                                                                                    | Lower your HR in order to hear the alpha cat meow, so that you can find it and rescue the cat. Deep breathing is encouraged to lower HR through gamification techniques                                                                                                                                                                                                     | Proof of concept                                                                                                                                                                                                                                                                                                                                                  | Gamification and real-time visual and auditory feedback on internal states help people learn to regulate their internal states.                                                                                                                                                                                                               |

| 1. source and full reference                                                                                                                                                                                                                                                                                                                                                                                                                                                                                    | 2. description and name of the immersive interactive system                                                                                                        | 3. relevance to well-being and positive functioning                                                                                             | 4. type of XR                     | 5. technology used                                    | 6. platform                                                                                                    | 7. target user                                                            | 8. number of users in study | 9. input / output modalities                                                                          | 10. design elements and interaction strategies used                                                                                                                                                                                                                                                                                                                                                                                                                                                                                                                                                                                                                                                                                               | 11. outcome                                                                                                                                                                                                                                                                                                                                        | 12. how design elements and interaction strategies contributed to support positive change and/or elicit positive states                                                                                                                                                                                                                                                                                                                                                                                                                                                                                                                          |
|-----------------------------------------------------------------------------------------------------------------------------------------------------------------------------------------------------------------------------------------------------------------------------------------------------------------------------------------------------------------------------------------------------------------------------------------------------------------------------------------------------------------|--------------------------------------------------------------------------------------------------------------------------------------------------------------------|-------------------------------------------------------------------------------------------------------------------------------------------------|-----------------------------------|-------------------------------------------------------|----------------------------------------------------------------------------------------------------------------|---------------------------------------------------------------------------|-----------------------------|-------------------------------------------------------------------------------------------------------|---------------------------------------------------------------------------------------------------------------------------------------------------------------------------------------------------------------------------------------------------------------------------------------------------------------------------------------------------------------------------------------------------------------------------------------------------------------------------------------------------------------------------------------------------------------------------------------------------------------------------------------------------------------------------------------------------------------------------------------------------|----------------------------------------------------------------------------------------------------------------------------------------------------------------------------------------------------------------------------------------------------------------------------------------------------------------------------------------------------|--------------------------------------------------------------------------------------------------------------------------------------------------------------------------------------------------------------------------------------------------------------------------------------------------------------------------------------------------------------------------------------------------------------------------------------------------------------------------------------------------------------------------------------------------------------------------------------------------------------------------------------------------|
| Navarro-Haro, M. V., Lloca-del-Hoyo, Y., Campos, D., Ulinhan, M. M., Hoffman, H. G., Garcia-Palacios, A., Montano-Arcon, M., et al. (2017). Meditation experts in Virtual Reality Mindfulness: A pilot study evaluation of the feasibility and acceptability of Virtual Reality to facilitate mindfulness practice in people attending a Mindfulness conference. <i>PLoS One</i> , San Francisco, 12(11), e0187777. <a href="https://doi.org/10.1371/journal.pone.0187777">doi:10.1371/journal.pone.0187777</a> | VR Dialectical Behavioral Therapy (DBT®): mindfulness skills training technique                                                                                    | Regular mindfulness practice benefits people both mentally and physically                                                                       | VR                                | HMD                                                   | Oculus Rift DK2                                                                                                | people who have trouble focusing attention                                | 44 (28 Female)              | input: head movement; output: virtual view                                                            | Nature visuals and sounds matched a guided meditation instruction, where the participant could follow along and practice focusing and paying attention with minimal distractions and concrete things to focus on.                                                                                                                                                                                                                                                                                                                                                                                                                                                                                                                                 | participants reported significantly less sadness, anger, and anxiety, and reported being significantly more relaxed                                                                                                                                                                                                                                | VR is a highly controlled world that allows the user to focus on the essentials during meditation and blocks out other distractions. This is good for those who have trouble focusing their attention or more traditional forms of meditation due to work.                                                                                                                                                                                                                                                                                                                                                                                       |
| Palmieri, R., Mueller, F., Topp, T., Leckrone, M., & Duckworth, J. (2017). Life Tree: Understanding the Design of Breathing Exercise Games. <i>Proceedings of the Annual Symposium on Computer-Human Interaction in Play</i> , CHI PLAY '17 (pp. 18–31). New York, NY, USA: ACM. <a href="https://doi.org/10.1145/3116695.3116621">doi:10.1145/3116695.3116621</a>                                                                                                                                              | Life Tree: a virtual reality (VR) game in which a player controls the growth of a tree by practicing pursed-up breathing.                                          | Regular breathing exercises can be a beneficial part of leading a healthy life.                                                                 | VR                                | biofeedback                                           | HMD, microphone                                                                                                | Smartphone + HMD, Breathing headset                                       | 32 (16 Female)              | input: pursed lip breathing; output: virtual tree growth                                              | Inhaling expands tree, and exhaling contracts tree. Sitting (phone accelerometer) will trigger tree to be submerged in water. Leaves are blown on exhalation. Background rhythmic breathing to help players match their breathing.                                                                                                                                                                                                                                                                                                                                                                                                                                                                                                                | Overall, participants liked playing Life Tree. They reported that "the game was very fascinating and de-stressing". They also thought of it as a novel experience. P17, a female participant said, "It is really good. I feel surprised about that game because I have not experienced such a kind of game before. It really felt special for me". | Design considerations listed: 1. Consider Using Subtle Onboarding to Help Players Engage with the Breathing Exercises; 2. Consider Using Non-Intuitive Breathing Feedback to Support Self-Awareness of Breathing During Gameplay; 3. Consider Using the Objects in the Game Environment to Provide Intuitive Breathing Feedback; 4. Consider Using a Minimalist Approach to Designing Naturalistic Visuals to Help Players Focus on their Breathing; 5. Consider the Intimate Placement of Breathing Hardware and how it can Affect Breathing Performance; 6. Consider Designing Breathing Hardware that Helps Players Hear their Own Breathing. |
| Pipa, M., Cochrane, K., & Riecke, B. E. (2015). Hacking Alternatives in 21st Century: Designing a Bio-Responsive Virtual Environment for Stress Reduction. <i>Pervasive Computing, Paradigms for Mental Health: Communications in Computer and Information Science</i> (pp. 34–39). Presented at the International Symposium on Pervasive Computing Paradigms for Mental Health, Springer, Cham. <a href="https://doi.org/10.1007/978-3-319-26270-4_4">doi:10.1007/978-3-319-26270-4_4</a>                      | SOLAR: Immersive virtual environment (VE) that assists novice users to learn the stress reducing practice of mindfulness meditation                                | Meditation practice is known to reduce stress                                                                                                   | soundscape, biofeedback           | EEG, respiration belt                                 | Emvot Epic, Thought Technology ProComp2, Unity, Max MSP                                                        | novice meditators                                                         | 13                          | input: brain electrical activity, respiration; output: meditation sounds and visuals                  | In SOLAR, the user is rewarded with a complex soundscape when they are taking deep breaths from their diaphragm. If the user begins to breath from their chest (above their thorax) or starts taking shallow breaths, the soundscape becomes simplified. In the visuals, the respiration sensors are mapped to the "breathing circle" (in front of the silhouette). The breath circle becomes larger and smaller as the user inhales and exhales.                                                                                                                                                                                                                                                                                                 | Participants felt relaxed                                                                                                                                                                                                                                                                                                                          | The following design principles were applied: 1. thought distracting - distancing from negative thoughts; 2. abstract visual elements - pleasant visual feedback; 3. rewarding system - motivational feedback; 4. Immersive and Attention Restorative Environments - nature elements.                                                                                                                                                                                                                                                                                                                                                            |
| Pipa, M., Quenel, D., Vidyarthi, J., Kilian, A., & Riecke, B. E. (2016). Sonic Cradle – Immersive inter-actio design action-com-bining breathing- and neo-ro-feedback to foster focused attention-mindfulness on breath. Presented at the 2nd International Conference on Mindfulness, Rome, Italy.                                                                                                                                                                                                             | Sonic Cradle: a system that encourages deep diaphragm (abdominal) breathing by providing real-time neuro- and biofeedback generated from EEG and respiration data. | Mindfulness meditation practice is widely recognized for its psycho-logical and physical well-being benefits                                    | soundscape, biofeedback           | EEG, respiration belt, surround-sound                 | Interaxon Muse, Max MSP, Thought Technology ProComp2                                                           | novice meditators                                                         | 8                           | input: brain activity, respiration; output: sound                                                     | When EEG data reveals a state of distraction, the soundscape becomes more salient, increasing its ability to cue users back to their breath with curiosity. Once they achieve focused attention, the interaction paradigm fades out, allowing users to meditate undisturbed.                                                                                                                                                                                                                                                                                                                                                                                                                                                                      | Self-reported anxiety and arousal levels decreased, and pleasantness increased                                                                                                                                                                                                                                                                     | Sounds and physical set-up was relaxing and had minimal distractions that allowed focus on meditation. Biofeedback gave users a sense of their performance and gently guided them back to their breath when distracted. The revisions could include instructions to emphasize reflection on "calmness," which is suggestive of mindfulness practices' focus of inner sensations opposed to a quantification of performance.                                                                                                                                                                                                                      |
| Pipa, M., Tatar, K., Riecke, B. E., & Pasquier, P. (2017). The Pulse Breath Water System: Exploring Breathing as an Embodied Interaction for Enhancing the Affective Potential of Virtual Reality, Virtual, Augmented and Mixed Reality, Lecture Notes in Computer Science (pp. 153–172). Presented at the International Conference on Virtual, Augmented and Mixed Reality, Springer, Cham. <a href="https://doi.org/10.1007/978-3-319-57987-0_13">doi:10.1007/978-3-319-57987-0_13</a>                        | Pulse Breath Water: immersive virtual environment (VE) with affect estimation in sound                                                                             | the integrity of our minds and bodies engaged in actions with environments, in a process through which meaning and understanding are generated. | VR                                | biofeedback                                           | HMD, respiration belt                                                                                          | Oculus Rift DK2, Thought Technology, Max MSP patch, M+M middleware, Unity | 24 (16 Female)              | input: respiration rate, arousal; output: use position vertically, wave amplitude                     | Breathing frequency as well as eventfulness (arousal) and pleasantness (valence) levels of the audio environment are sent from Max map patch to the game engine Unity 3D. In Unity, the value of eventfulness is mapped to the waves of the ocean. Higher aroused states result in a more disturbed ocean surface and waves. The colour of the sky progresses from grey (at the beginning of the experience) to pitch black (at the end of a session) over the span of eight minutes. A participant's breathing data controls the elevation of the user in the VE in that, when the user breathes in, their position in the environment is elevated so they can rise above the ocean surface. Similarly, when the participant exhales, they sink. | Relaxed, calm, engaged, breath awareness                                                                                                                                                                                                                                                                                                           | Familiarity First, Engagement After: Tension and Relaxation, at the Same Time, Environmental Context is the Key                                                                                                                                                                                                                                                                                                                                                                                                                                                                                                                                  |
| Quenel, D., & Riecke, B. E. (2017). Awestruck: Natural interaction with virtual reality on eliciting awe (pp. 205–206). IEEE. <a href="https://doi.org/10.1109/3DUI.2017.7893343">doi:10.1109/3DUI.2017.7893343</a>                                                                                                                                                                                                                                                                                             | Google Earth VR: flying interface to explore the Earth, leading to the experience of awe                                                                           | transformative experiences, the feeling of awe is found to alter an individual's perception in positive, lasting manners.                       | VR                                | HMD, camera                                           | HTC Vive, Senneiser noise-cancelling headphones, Logitech HD C270 webcam and LEDs casting unidirectional light | humans                                                                    | 16 (6 Female)               | input: HTC Vive wands; output: flight in 3D                                                           | connection with the planet; movement by flying with natural interaction (use of bean bag chair), nature elements – Earth from space and zooming into famous places or home town                                                                                                                                                                                                                                                                                                                                                                                                                                                                                                                                                                   | 43.8% of the participants experienced goose bumps; if they experienced goose bumps they were more likely to experience awe. Females were more likely to experience goose bumps (but not awe) than males. No differences in fight vs. standing conditions.                                                                                          | interactive VR can induce both subjective and physiological indicators of awe, embodied interfaces must have low cognitive load and inarduous interactions to be successful.                                                                                                                                                                                                                                                                                                                                                                                                                                                                     |
| Boo, J. S., Gervais, B., Frey, J., & Hiebert, M. (2017). Inner Garden: Connecting Inner States to a Mixed Reality Sandbox for Mindfulness. <i>Proceedings of the 2017 CHI Conference Extended Abstracts on Human Factors in Computing Systems</i> , CHI EA '16 (pp. 1988–1997). New York, NY, USA: ACM. <a href="https://doi.org/10.1145/3059452">doi:10.1145/3059452</a>                                                                                                                                       | Inner Garden: augmented sandbox to support mindfulness practices                                                                                                   | Inspire self-motivation and curiosity                                                                                                           | AR, VR, biofeedback               | HMD, projector, respiration belt, HR monitor          | vrvv, Unity, OpenVIBE, ASUS short-throw projector, Kinect v1, Mio Fuse smartwatch, Oculus Rift DK2             | humans                                                                    | 12 Females                  | input: sculpting sand, breathing, HR; output: garden appearance                                       | oscillating breathing patterns are mapped to the water level (which creates waves), and to the wind strength (creating gusts of wind); Cardiac coherence was used to indicate garden health. When in good health, the amount of clouds reduces, flora's growth speed is increased and sounds caused by the fauna are more present. Note that there is no obvious "unhealthy" state; fauna might hide, but trees will not start dying as a result of a low CC score. The following design considerations were used: balance distraction and guidance, keep it minimalist, be non-judgmental and non-striving, promote acceptance and autonomy, use tangible interaction, choose the right reality.                                                 | They tested the system with meditation practitioners of different levels of experience (from initiated to daily meditators), which found the design engaging while also being well suited for mindfulness. Preliminary quantitative results seem to indicate that the system foster a calm and mindful state on the users.                         | Different mediums used for greater accessibility: AR for tangible interaction and "flying it out" VR for more immersive and personal experience and a chance to go deeper. Nature elements and biofeedback set the stage for a relaxing and inviting experience.                                                                                                                                                                                                                                                                                                                                                                                 |
| van Rooij, M., Lobel, A., Harris, O., Smi, N., & Granic, I. (2016). DEEP: A Biofeedback Virtual Reality Game for Children At-risk for Anxiety. <i>Proceedings of the 2016 CHI Conference Extended Abstracts on Human Factors in Computing Systems</i> , CHI EA '16 (pp. 1988–1997). New York, NY, USA: ACM. <a href="https://doi.org/10.1145/285181">doi:10.1145/285181</a>                                                                                                                                     | DEEP: a virtual reality (VR) game that situates players in a beautiful underwater fantasy world in which they can move around freely and explore at their leisure  | provide an immersive and relaxing experience in order to decrease anxiety                                                                       | VR, biofeedback                   | HMD, variable resistor/stretch sensor                 | Oculus DK                                                                                                      | children at risk for anxiety                                              | 86 (42 Female)              | input: respiration; output: expanding and contracting circle                                          | Large circle → inhalation peak, small circle → exhalation peak; lung capacity <50% → gravity applied; inhaling → upward movement, exhaling → downward movement                                                                                                                                                                                                                                                                                                                                                                                                                                                                                                                                                                                    | the pilot study demonstrated that playing DEEP reduces state-levels of anxiety in children and thus confirmed its potential as an intervention for anxiety                                                                                                                                                                                         | Dynamical Systems Theory (DST): real-time in-game information to dynamically adjust the game environment to individual learning trajectories. Use of natural imagery and sound to help increase relaxation. Immersive environment decreases outside distractions.                                                                                                                                                                                                                                                                                                                                                                                |
| Sakamoto, M., Nakajima, T., & Alexandrov, T. (2015). Enhancing values through virtuality for intelligent artifacts that influence human attitude and behavior. <i>MultiTrack Tools and Applications, Droidtech '14</i> (24), 11537–11568. <a href="https://doi.org/10.1145/2694549">doi:10.1145/2694549</a>                                                                                                                                                                                                     | MikuMikuDance: AR trading card game                                                                                                                                | Supports telepresence, socialness                                                                                                               | AR, tangibles                     | Projectors, motion capture, web camera                | Kinect, OpenNI, Skype                                                                                          | gamers                                                                    | N/A                         | input: body movement, trading cards; output: virtual character movement, augmented card projection    | Real and digital combined to provide presence and keep the tactile feel of traditional trading card games. Virtual avatars are customizable for personal element                                                                                                                                                                                                                                                                                                                                                                                                                                                                                                                                                                                  | Proof of concept                                                                                                                                                                                                                                                                                                                                   | Customizable game helps to engage user. Use of cameras and projection can help users feel like they are playing with a real person, thus increasing social connection.                                                                                                                                                                                                                                                                                                                                                                                                                                                                           |
| Seaborn, K. A. (2015). Mixed Reality Gaming for Older Powered Chair Users: A Human Factors Model of Well-being and Engagement (Ph.D.). Canada: University of Toronto (Canada). Retrieved from <a href="https://search.proquest.com/proq-ilj/sk/abstractview/163398687/pq-ri4300762/e26945494P031">https://search.proquest.com/proq-ilj/sk/abstractview/163398687/pq-ri4300762/e26945494P031</a>                                                                                                                 | Powered to Play (PTP): capture-the-flag game that is an accessible, social mixed reality game for co-located mobile play in everyday spaces                        | Promotes dental health                                                                                                                          | AR, tangibles                     | Accelerometer, mirror display                         | 3-axis accelerometer sensor                                                                                    | humans                                                                    | N/A                         | input: brush teeth; output: fish dance and aquarium prospers                                          | Start to brush teeth → scrubber cleans the aquarium; Brush → fish start moving; Finish brushing for sufficient time → scrubber stops and fish dance elegantly. Each day of brushing more fish are born. Don't brush and aquarium gets dirty and fish die.                                                                                                                                                                                                                                                                                                                                                                                                                                                                                         | Proof of concept                                                                                                                                                                                                                                                                                                                                   | Six values were extracted from their case studies: 1. empathetic value - empathy for characters strengthens buy-in to experience; 2. persuasive value - offering feedback can alter user's attitudes and behaviours; 3. informative value - offering information so that the user can change; 4. economic value - tangible value that is not actually money or goods; 5. aesthetic value - using art and beauty can improve our mood and sense of well-being; 6. ideological value - increasing self-efficacy through education.                                                                                                                 |
| Shaw, C. D., Gromala, D., & Seay, A. F. (2007). The meditation chamber: Enacting autonomic senses. <i>Proc. of ENACTIVE'07</i> .                                                                                                                                                                                                                                                                                                                                                                                | Meditation Chamber: bio-interactive, therapeutic, virtual environment                                                                                              | helps users lower their stress levels through meditation and muscle relaxation                                                                  | MR                                | HMD, GSR, respiration belt, blood volume pulse sensor | VFX-3D (Interactive Imaging Systems), Thought Technologies ProComp2, SVE Toolkit                               | novice meditators                                                         | 13 (8 Female)               | input: physical movement; output: capture flag for points                                             | Based on the following design recommendations: 1. multiple people with various skills and abilities can play; 2. intergenerational gaming; 3. opportunities to meet and collaborate with new people toward a common goal; 4. fair playing field; 5. challenge and strategy; 6. Accessible and easy to use equipment and interface design; 7. outdoor play space; 8. opportunities to improve skills and abilities                                                                                                                                                                                                                                                                                                                                 | participants found the game to be fun, social, and accessible, and engaged with the game in a variety of ways. Participants experienced high leveled engagement.                                                                                                                                                                                   | Visuals and sound provided real-time feedback on performance, allowing the user to adjust their internal states. Use of abstract and natural imagery provided a means to focus on that is pleasant and relaxing and decreased external distractions. Few instructions allowed for playful interaction and unstructured learning.                                                                                                                                                                                                                                                                                                                 |
| Vidyarthi, J. (2012). Sonic Cradle: Evoking Mindfulness through Immersive Interaction Design (MSc. Thesis). Surrey, BC, Canada: Simon Fraser University. Retrieved from <a href="https://www.sfu.ca/~vidyarthi/sonic-cradle/">https://www.sfu.ca/~vidyarthi/sonic-cradle/</a>                                                                                                                                                                                                                                   | Sonic Cradle: an immersive, interactive soundscape designed for novice meditator to explore their breathing                                                        | introduces a relaxing HCI paradigm to foster mindfulness-like meditative states                                                                 | immersive soundscape, biofeedback | respiration physiological sensor, surround-sound      | Max MSP, Thought Technology ProComp2                                                                           | novice meditators                                                         | 39 (15 Female)              | input: breathing from abdomen and chest; hold breath to add sounds, breath quickly to subtract sounds | Mindfulness practice → Sonic Cradle Interaction<br>Calm focused attention → focus on respiratory control through sound interaction<br>Wandering mind → Wandering mind sounds change<br>Meta-awareness → Automatic breathing as attention is brought back to sounds and user wonders how their breathing controls it                                                                                                                                                                                                                                                                                                                                                                                                                               | 411                                                                                                                                                                                                                                                                                                                                                | Playful, non-invasive made experience inviting. Dark room with only soundscapes decreased distractions and allowed focus on breathing and present moment. Selected sounds were meditative in nature – neutral or calm yet still energetic enough to keep attention. Easy to learn mapping to explore breath. Auditory feedback on performance.                                                                                                                                                                                                                                                                                                   |
| Wietlauf, A., & Buz, A. (2019). ColorVision: Controlling Light Patterns Through Postures. <i>Proceedings of the 10th International Conference on Smart Graphics</i> , SG 10 (pp. 281–284). Berlin, Heidelberg: Springer-Verlag Berlin Heidelberg. Retrieved from <a href="http://dl.acm.org/citation.cfm?id=1894345.1894384">http://dl.acm.org/citation.cfm?id=1894345.1894384</a>                                                                                                                              | ColorVision: people use their posture to change the color of a room, reflected as their current mood                                                               | people experience the psychological effects of different colors                                                                                 | immersive room installation       | Cameras, RGB lamps                                    | C++ video analysis software, DMX converter                                                                     | humans                                                                    | N/A                         | input: posture in chair; output: room colour                                                          | The implemented body interface controls the room through posture. Red, for example, is activated through an open, active seating position. Green is the color for introverted reflectiveness as generated if a person takes a thoughtful, closed position. A person, sitting on the chair in a stretched, relaxed position plunges the room into a cool blue as the color for calmness.                                                                                                                                                                                                                                                                                                                                                           | Different emotional color impressions were reported from the participants. Asked about their emotional state when exposed to one color, for example red, the participants reported an increased level of "nervousness." An intensive exposure in a relaxed posture to the color blue was described as "peaceful."                                  | Playful interactions with the body interface were perceived positively. Users were curious to try out different postures to see how that affected the colour. Users also reflected on their own emotions by perceiving the colour of the room. The internal states are shown internal states visualized and, in turn, the visuals affect the user's internal states – feedback loop                                                                                                                                                                                                                                                              |
